# Supplementary material for: 10,000 years of centennially-resolved climate and sea-level change archived in Svalbard beach ridge system
Source: Research Square preprint supplement (doi:10.21203/rs.3.rs-6879659/v1), 2025-06-30
Supplement: Supplementary file 1 [file 19c9e5808bb6213adedea6fb.pdf]

# Supplement 1

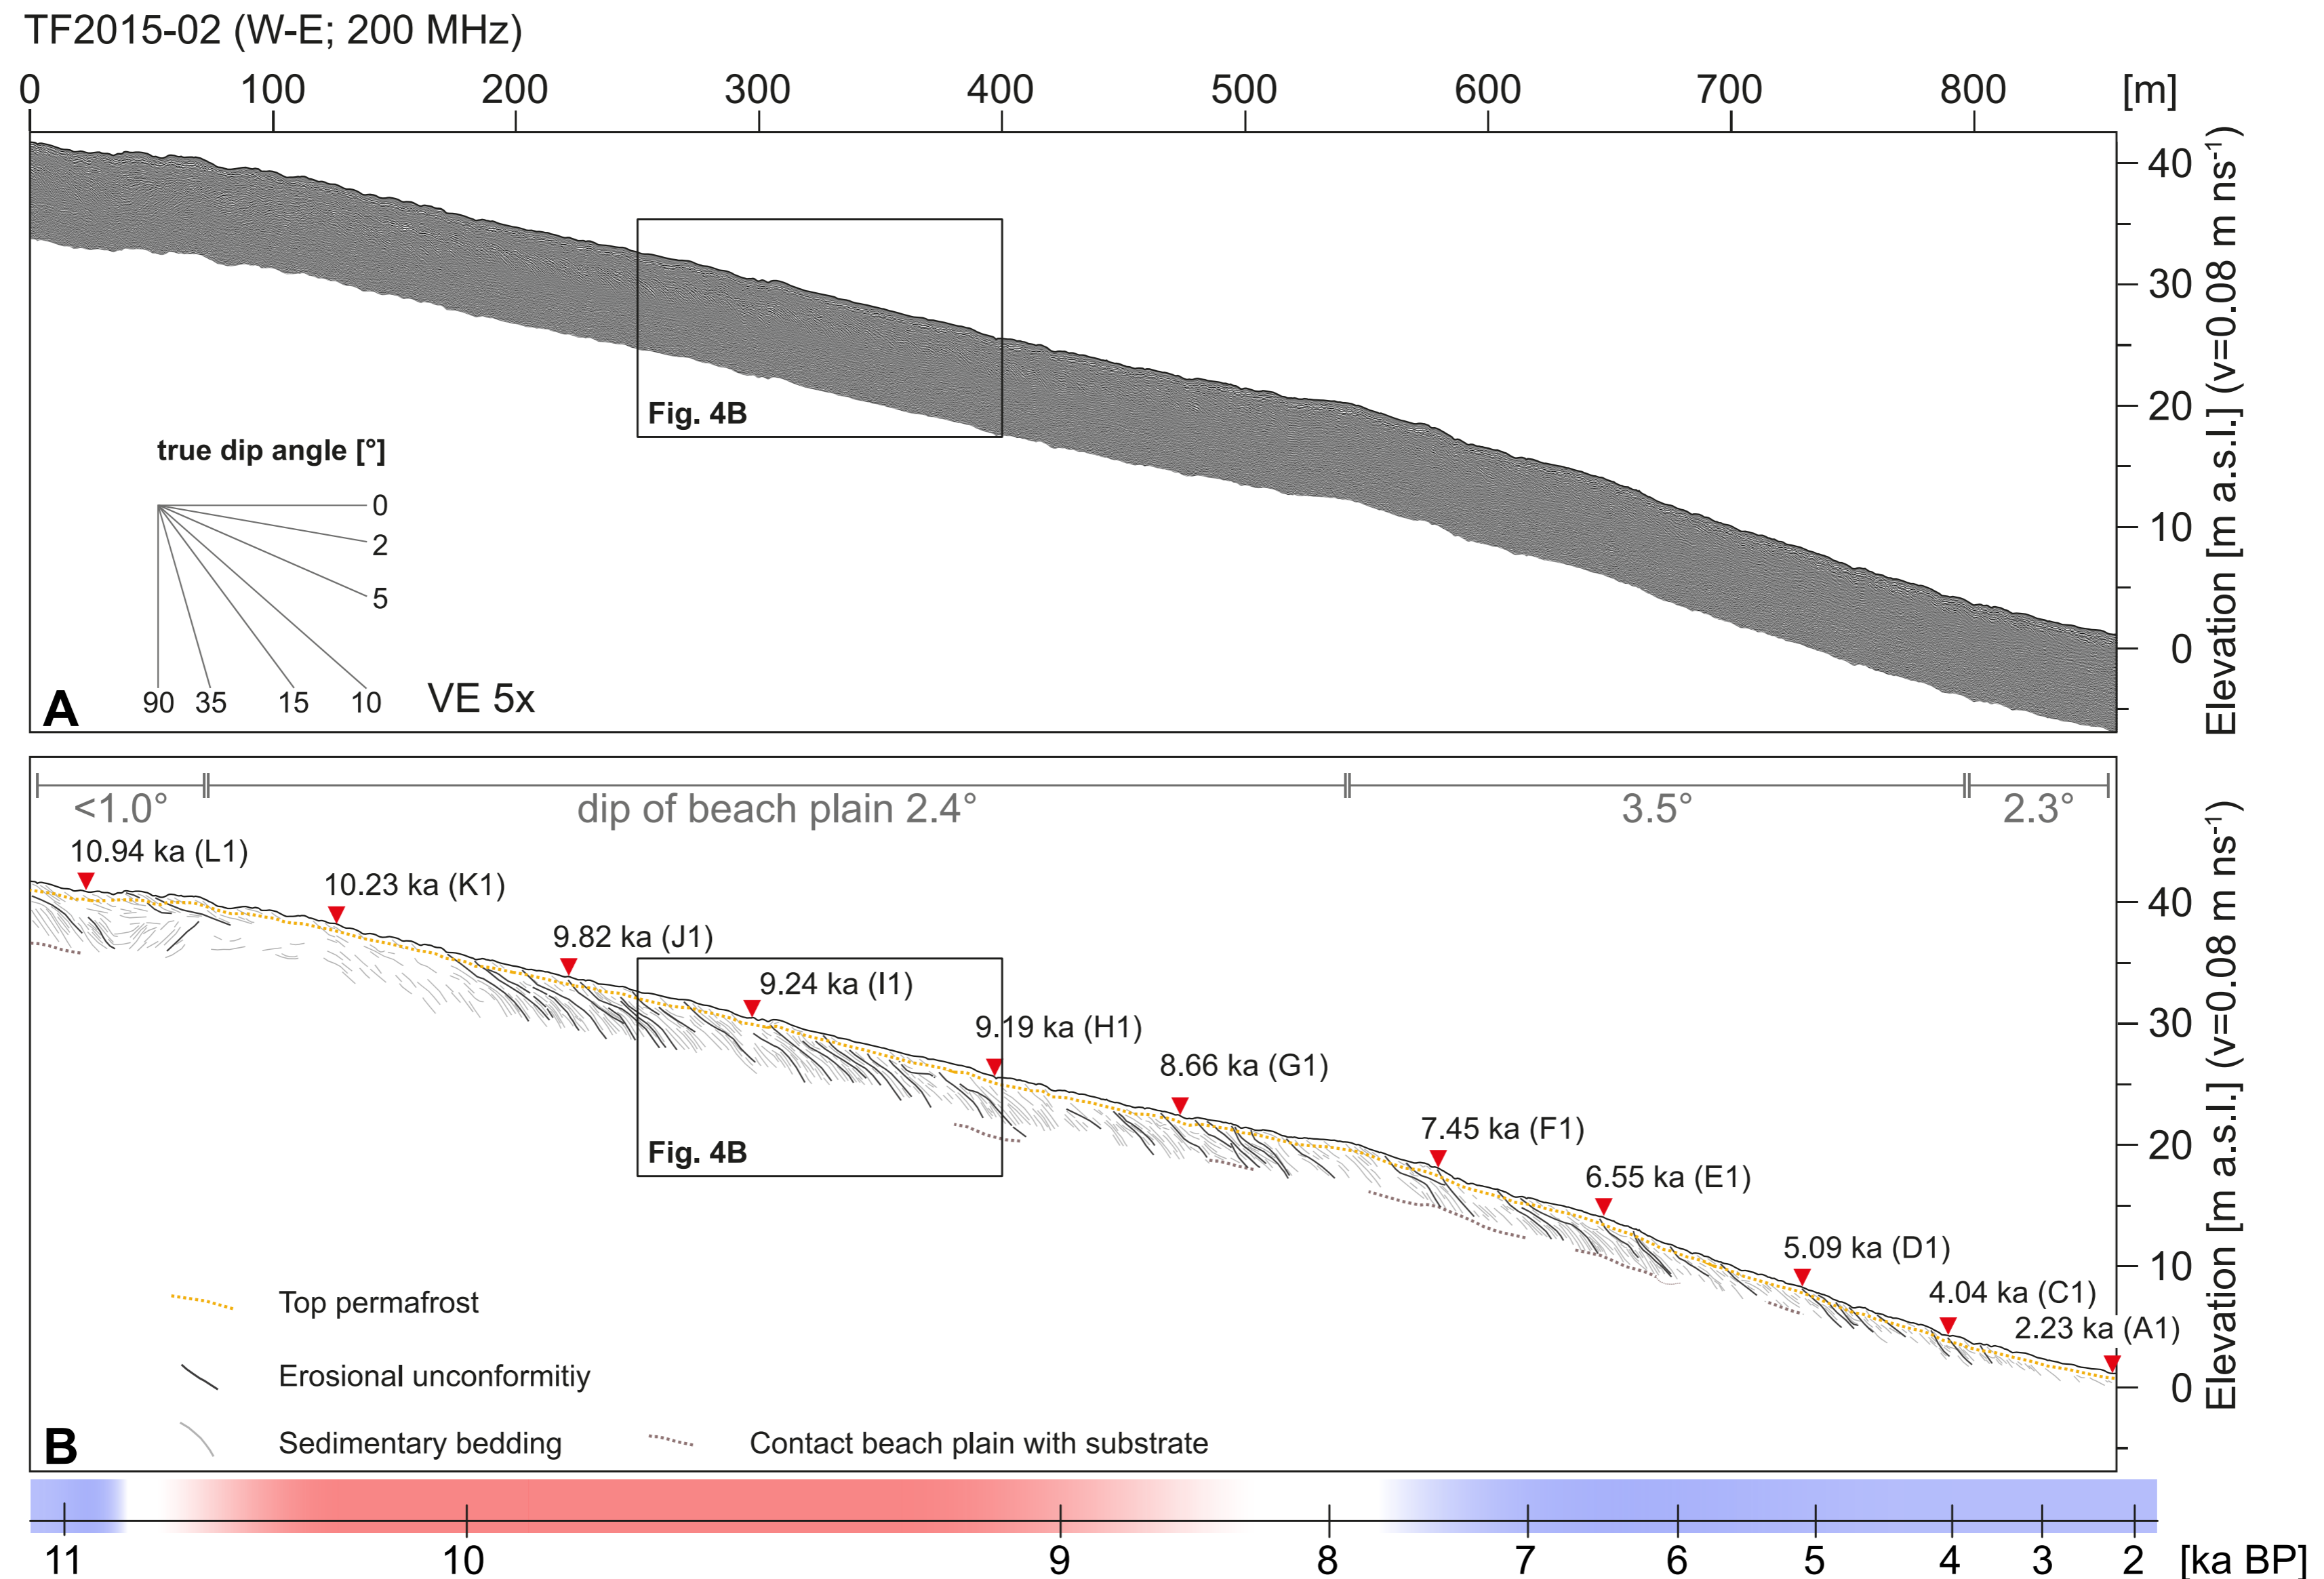

**Ground-penetrating radar (GPR) line TF2015-02** (see Figs. 1, 8 for location).

**A)** GPR data obtained with a 200 MHz antenna (see Methods for details on data acquisition and processing). Data are shown with 5-time vertical exaggeration; **B)** Line-drawing and interpretation of A, Numbers A1 to L1 refer to calibrated radiocarbon ages (see Table 1 for data and Fig. 8 for sample positions) and were projected along the ridges onto the line. Yellow and blue bars indicate warm and cold climate episodes, respectively (compare Fig. 6)
